# Supplementary material
Source: PubMed Central journal article supplement (PMC5444423)
Supplement: Supp_Fig1.pdf [file Supp_Fig1.pdf]

## Supplementary Data

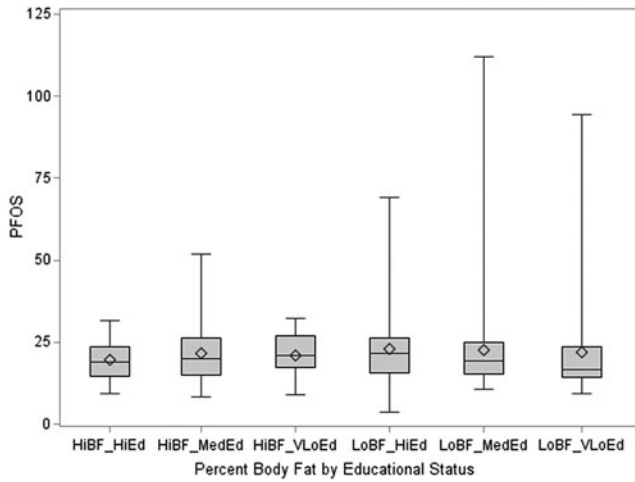

**Supplementary Figure S1. Boxplot of PFOS by percent body fat (overweight no/yes) and education (low, medium, high). Plots include ranges, 25th and 75th percentiles, medians (line), and means (open diamond). HiBF >29%. HiBF, high body fat; PFOS, perfluorooctane sulfonate.**
