# Supplementary material
Source: PubMed Central journal article supplement (PMC5444423)
Supplement: Supp_Fig2.pdf [file Supp_Fig2.pdf]

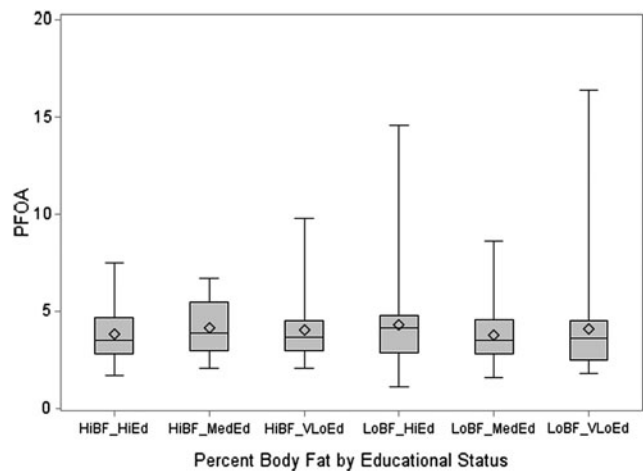

**Supplementary Figure S2. Boxplot of PFOA by percent body fat (overweight no/yes) and education (low, medium, high). Plots include ranges, 25th and 75th percentiles, medians (line), and means (open diamond). HiBF >29%. PFOA, perfluorooctanoate. HiBF, high body fat.**
