# Supplementary material
Source: PubMed Central journal article supplement (PMC5444423)
Supplement: Supp_Table1.pdf [file Supp_Table1.pdf]

**Supplementary Table S1. Sample Characteristics for Mothers of Girls and Girls at 9 Years of Age with PFASs and DXA**

| <b>Variable</b>                                | <b>N</b> | <b>Median (IQR)</b> |
|------------------------------------------------|----------|---------------------|
| PFOA (ng/mL)                                   | 359      | 3.7 (2.9–4.8)       |
| PFOS (ng/mL)                                   | 359      | 19.8 (15.0–25.3)    |
| PFHxS (ng/mL)                                  | 359      | 1.6 (1.3–2.2)       |
| PFNA (ng/mL)                                   | 358      | 0.5 (0.4–0.7)       |
| Gestational age at blood collection (weeks)    | 359      | 15 (10–28)          |
| Maternal age at collection (years)             | 359      | 28.8 (25.6–32.1)    |
| Girls' DXA-derived total body fat at age 9 (%) | 359      | 27.5 (21.7–34.6)    |
| Girls' DXA-derived trunk body fat at age 9 (%) | 359      | 39.6 (36.5–43.7)    |
| Girls' BMI at age 9 (kg/m <sup>2</sup> )       | 351      | 18.1 (16.3–20.6)    |
| Girls' WC at age 9 (cm)                        | 359      | 62.7 (58.6–68.8)    |
| Girls dietary intake at age 7                  | 340      |                     |
| Energy (kcal)                                  |          | 1649 (1426–1857)    |
| Fat (% energy)                                 |          | 36.7 (33.5–39.7)    |
| Carbohydrate (% energy)                        |          | 53.5 (50.0–57.1)    |
| Protein (% energy)                             |          | 13.0 (11.5–14.5)    |

DXA, dual energy X-ray absorptiometry; IQR, interquartile range; PFHxS, perfluorohexane sulfonate; PFNA, perfluorononanoate; PFOA, perfluorooctanoate; PFOS, perfluorooctane sulfonate; WC, waist circumference.
