# Supplementary material
Source: PubMed Central journal article supplement (PMC5444423)
Supplement: Supp_Table2.pdf [file Supp_Table2.pdf]

**Supplementary Table S2. Regression Coefficients ( $\beta$ ) for the Relationship between Perfluoroalkyl Substances and Measures of Body Fatness (Unadjusted) Stratified by Educational Status**

| Analyte              | DXA-total body fat (%) |                |              |
|----------------------|------------------------|----------------|--------------|
|                      | $\beta$                | 95% CI         | p            |
| PFOS (ng/mL)         |                        |                |              |
| Overall <sup>a</sup> | -0.03                  | -0.11 to 0.05  | 0.47         |
| Low education        | 0.03                   | -0.11 to 0.17  | 0.71         |
| Medium               | 0.12                   | -0.04 to 0.27  | 0.13         |
| High                 | -0.18                  | -0.30 to -0.06 | <b>0.002</b> |
| PFOA (ng/mL)         |                        |                |              |
| Overall <sup>a</sup> | -0.17                  | -0.60 to 0.26  | 0.44         |
| Low education        | -0.22                  | -1.13 to 0.68  | 0.63         |
| Medium               | 1.42                   | 0.38 to 2.45   | <b>0.007</b> |
| High                 | -0.51                  | -1.05 to 0.02  | 0.06         |
| PFHxS (ng/mL)        |                        |                |              |
| Overall <sup>a</sup> | -0.03                  | -0.16 to 0.10  | 0.65         |
| Low education        | -0.07                  | -0.34 to 0.20  | 0.59         |
| Medium               | 0.19                   | -0.12 to 0.49  | 0.23         |
| High                 | -0.09                  | -0.26 to 0.08  | 0.29         |
| PFNA (ng/mL)         |                        |                |              |
| Overall <sup>a</sup> | 2.12                   | -0.89 to 5.12  | 0.17         |
| Low education        | 16.32                  | 4.31 to 28.33  | <b>0.008</b> |
| Medium               | 2.93                   | -2.10 to 7.97  | 0.25         |
| High                 | -0.06                  | -3.68 to 3.57  | 0.97         |

<sup>a</sup>Overall N = 359; N = 61, N = 115, and N = 170 for the low, medium, and high educated groups, respectively, with N = 13 missing educational status.
