# Supplementary material
Source: PubMed Central journal article supplement (PMC5444423)
Supplement: Supp_Table3.pdf [file Supp_Table3.pdf]

**Supplementary Table S3. Characteristics of Study Population (N = 359)—Body Fatness Measures by Educational Status**

|                    | Frequency<br>N (%) | Total body fat (%) | Trunk body fat (%) | BMI (kg/m <sup>2</sup> ) | Waist (cm)       |
|--------------------|--------------------|--------------------|--------------------|--------------------------|------------------|
|                    |                    | Median (IQR)       |                    |                          |                  |
| Overall            | 359 (100)          | 27.5 (21.7–34.6)   | 39.6 (36.5–43.7)   | 18.1 (16.3–20.6)         | 62.7 (58.6–68.8) |
| Maternal education |                    |                    |                    |                          |                  |
| Low                | 61 (17.0)          | 28.7 (23.1–38.7)   | 40.8 (37.0–45.1)   | 19.2 (17.2–23.0)         | 65.4 (61.3–70.2) |
| Medium             | 115 (32.0)         | 28.1 (21.9–35.4)   | 40.0 (36.5–43.7)   | 18.0 (16.8–20.8)         | 62.1 (58.0–69.0) |
| High               | 170 (47.4)         | 26.5 (20.8–33.0)   | 38.8 (36.1–43.4)   | 17.7 (16.1–20.1)         | 62.0 (58.2–68.3) |
| Missing            | 13 (3.6)           | 25.1 (22.6–37.5)   | 42.0 (38.7–43.9)   | 18.9 (15.3–21.1)         | 63.8 (56.6–67.7) |
