# Supplementary material
Source: PubMed Central journal article supplement (PMC5444423)
Supplement: Supp_Table4.pdf [file Supp_Table4.pdf]

**Supplementary Table S4. Regression Coefficients ( $\beta$ ) for the Relationship between Perfluoroalkyl Substances and DXA-Total Body Fat (%) Overall and by Educational Status (Low, Medium, High) Stratified by Age at Menarche**

| Analyte              | DXA-total body fat (%)<br>Menarche <11.5 years (N = 149) |                |             | DXA-total body fat (%)<br>Menarche $\geq$ 11.5 years (N = 170) |                |             |
|----------------------|----------------------------------------------------------|----------------|-------------|----------------------------------------------------------------|----------------|-------------|
|                      | $\beta$                                                  | 95% CI         | p           | $\beta$                                                        | 95% CI         | p           |
| PFOS (ng/mL)         |                                                          |                |             |                                                                |                |             |
| Overall <sup>a</sup> | -0.06                                                    | -0.18 to 0.07  | 0.39        | -0.07                                                          | -0.19 to -0.05 | 0.25        |
| Low education        | 0.49                                                     | 0.02 to 0.96   | <b>0.04</b> | 0.02                                                           | -0.24 to 0.29  | 0.86        |
| Medium               | -0.12                                                    | -0.27 to 0.03  | 0.12        | 0.12                                                           | -0.13 to 0.37  | 0.35        |
| High                 | -0.04                                                    | -0.29 to 0.22  | 0.78        | -0.19                                                          | -0.35 to 0.03  | <b>0.02</b> |
| P-interactions       |                                                          |                | 0.05        |                                                                |                | 0.10        |
| PFOA (ng/mL)         |                                                          |                |             |                                                                |                |             |
| Overall <sup>a</sup> | -0.10                                                    | -0.94 to 0.73  | 0.81        | -0.31                                                          | -0.94 to 0.31  | 0.32        |
| Low education        | 1.29                                                     | -0.34 to 2.93  | 0.12        | -1.16                                                          | -2.98 to 0.66  | 0.21        |
| Medium               | -0.57                                                    | -2.27 to 1.13  | 0.51        | 1.43                                                           | 0.11 to 2.98   | 0.07        |
| High                 | -0.58                                                    | -1.74 to 0.57  | 0.32        | -0.57                                                          | -1.29 to 0.15  | 0.12        |
| P-interactions       |                                                          |                | 0.16        |                                                                |                | 0.05        |
| PFHxS (ng/mL)        |                                                          |                |             |                                                                |                |             |
| Overall <sup>a</sup> | -0.20                                                    | -0.61 to 0.21  | 0.34        | -0.05                                                          | -0.26 to 0.15  | 0.62        |
| Low education        | 0.19                                                     | -3.30 to 3.69  | 0.91        | -3.39                                                          | -7.47 to 0.67  | 0.10        |
| Medium               | -0.27                                                    | -0.69 to 0.15  | 0.21        | 0.21                                                           | -0.30 to 0.73  | 0.42        |
| High                 | 0.74                                                     | -0.93 to 2.41  | 0.38        | -0.09                                                          | -0.31 to 0.13  | 0.42        |
| P-interactions       |                                                          |                | 0.50        |                                                                |                | 0.16        |
| PFNA (ng/mL)         |                                                          |                |             |                                                                |                |             |
| Overall <sup>a</sup> | 1.08                                                     | -4.57 to 6.73  | 0.71        | 1.64                                                           | -2.37 to 5.66  | 0.42        |
| Low education        | 7.99                                                     | -3.95 to 19.93 | 0.19        | 13.38                                                          | -4.45 to 31.22 | 0.14        |
| Medium               | -4.91                                                    | -15.63 to 5.80 | 0.37        | 3.42                                                           | -3.76 to 10.61 | 0.35        |
| High                 | 1.35                                                     | -6.45 to 9.15  | 0.73        | 0.09                                                           | -4.77 to 4.96  | 0.97        |
| P-interactions       |                                                          |                | 0.29        |                                                                |                | 0.32        |

<sup>a</sup>Models adjusted for prepregnancy BMI (kg/m<sup>2</sup>) and maternal educational status. PFNA models were also adjusted for maternal smoking status. Overall indicates a main effects model without the interaction terms.

<sup>b</sup>Column numbers reflect the number of observations used (no missing covariate data).
